# Supplementary material for: Scn2a Haploinsufficiency in Mice Suppresses Hippocampal Neuronal Excitability, Excitatory Synaptic Drive, and Long-Term Potentiation, and Spatial Learning and Memory
Source: Front Mol Neurosci. 2019 Jun 4;12:145. doi: 10.3389/fnmol.2019.00145 (PMC6582764; doi:10.3389/fnmol.2019.00145)
Supplement: Supplementary file 1 [file Table_1.xlsx]

## Sheet: Scn2a
Table S1. Statistical Results
Figure		Assay Performed	Parameter (Unit)	Comparison			N	Descriptive Statistics	Statistical Analysis					Column statistics
				Sex	Age	groups		Average ± SEM	Statistical Test		Significance			D'Agostino & Pearson normality test	Shapiro-Wilk normality test
1	C	Western Blot	Scn2a protein level	Male, Female	E20.5	WT, KO	4, 4	WT = 1 ± 0.1516	Unpaired Student's t-test		P = 0.0010, **	t(6)=5.948	Two-tailed		P = 0.6452, n.s.
								HT = 0.0869± 0.02415							P = 0.9848, n.s.
				Female	P56	WT, HT	4, 4	WT = 1 ± 0.03112	Unpaired Student's t-test		P = 0.0027, **	t(6)=4.91	Two-tailed		P = 0.3474, n.s.
								HT = 0.5877 ± 0.07801							P = 0.7226, n.s.
3	A	Step Input Current	Resting Membrane Potential(mV)	Female	P21	WT, HT	14(3), 14(3)	2-way ANOVA		Interaction :: P < 0.0001, ****, DF = 14 Time :: P < 0.0001, ****, DF = 14 Genotype :: P = 0.0237, *, DF = 1
									Sidak's multiple comparisons test	-150	P = 0.0453, *
										-140	P = 0.0488, *
										-130	P = 0.0589, n.s.
										-120	P = 0.0769, n.s.
										-110	P = 0.1092, n.s.
										-100	P = 0.1286, n.s.
										-90	P = 0.1713, n.s.
										-80	P = 0.1974, n.s.
										-70	P = 0.2974, n.s.
										-60	P = 0.3647, n.s.
										-50	P = 0.4971, n.s.
										-40	P = 0.6467, n.s.
										-30	P = 0.8570, n.s.
										-20	P = 0.9781, n.s.
										-10	P = 0.9998, n.s.
			Input Resistance(mΩ)	Female	P21	WT, HT	14(3), 14(3)	WT = 208 ± 23.97	Unpaired Student's t-test (Welch's Correction)		P = 0.0421, *	t(18.88)=2.18	Two-tailed	P = 0.4807, n.s.	P = 0.2906, n.s.
								HT = 149.9 ± 11.72						P = 0.1371, n.s.	P = 0.0534, n.s.
			Sag ratio (a.u.)	Female	P21	WT, HT	14(3), 14(3)	WT = 0.8821 ± 0.03247	Unpaired Student's t-test		P = 0.1218, n.s.	t(26)=1.6	Two-tailed	P = 0.1869, n.s.	P = 0.0858, n.s.
								HT = 0.8221 ± 0.01879						P = 0.3148, n.s.	P = 0.1964, n.s.
	B	Excitabiliity	Spike number (Count)	Female	P21	WT, HT	14(3), 14(3)	2-way ANOVA		Interaction :: P = 0.3831, n.s., DF = 11 Time :: P < 0.0001, ****, DF = 11 Genotype :: P = 0.0979, n.s., DF = 1
									Sidak's multiple comparisons test	0	P > 0.9999, n.s.
										30	P = 0.9611, n.s.
										60	P = 0.2378, n.s.
										90	P = 0.2378, n.s.
										120	P = 0.7872, n.s.
										150	P = 0.8355, n.s.
										180	P = 0.7872, n.s.
										210	P = 0.7872, n.s.
										240	P = 0.9401, n.s.
										270	P = 0.8355, n.s.
										300	P = 0.8774, n.s.
										330	P = 0.9123, n.s.
	C	Hippocampal CA1 sEPSC	sEPSC frequency (Hz)	Female	P21-24	WT, HT	20(4), 18(4)	WT = 0.6408 ± 0.1017	Mann-Whitney test (with Outlier test)		P = 0.0310, *	U = 106.5	Two-tailed	P = 0.1334, n.s.	P = 0.0095, **
								HT = 0.3569 ± 0.0591						P = 0.2509, n.s.	P = 0.0534, n.s.
			sEPSC amplitude (pA)	Female	P21-24	WT, HT	20(4), 18(4)	WT = 29.13 ± 1.532	Unpaired Student's t-test (with Outlier test)		P = 0.0287, *	t(36)=2.28	Two-tailed	P = 0.5019, n.s.	P = 0.4527, n.s.
								HT = 24.39 ± 1.385						P = 0.8592, n.s.	P = 0.8987, n.s.
	D	Hippocampal CA1 sIPSC	sIPSC frequency (Hz)	Female	P21-24	WT, HT	15(3), 13(3)	WT = 6.637 ± 0.3743	Unpaired Student's t-test		P = 0.6533, n.s.	t(26)=0.4545	Two-tailed	P = 0.7007, n.s.	P = 0.6167, n.s.
								HT = 6.296 ± 0.682						P = 0.1655, n.s.	P = 0.0507, n.s.
			sIPSC amplitude (pA)	Female	P21-24	WT, HT	15(3), 13(3)	WT = 33.79 ± 1.951	Unpaired Student's t-test		P = 0.5336, n.s.	t(26)=0.6309	Two-tailed	P = 0.6096, n.s.	P = 0.4255, n.s.
								HT = 36.23 ± 3.5						P = 0.2679, n.s.	P = 0.2842, n.s.
	E	Hippocampal CA1 mEPSC	mEPSC frequency (Hz)	Female	P21-24	WT, HT	13(3), 15(3)	WT = 0.2308 ± 0.02923	Mann-Whitney test		P = 0.3545, n.s.	U = 80.5	Two-tailed	P = 0.2790, n.s.	P = 0.3834, n.s.
								HT = 0.2033 ± 0.02081						P = 0.0167, *	P = 0.9022, n.s.
			mEPSC amplitude (pA)	Female	P21-24	WT, HT	13(3), 15(3)	WT = 22.5 ± 1.268	Unpaired Student's t-test		P = 0.9275, n.s.	t(26)=0.0919	Two-tailed	P = 0.1284, n.s.	P = 0.1410, n.s.
								HT = 22.34 ± 1.191						P = 0.3114, n.s.	P = 0.0725, n.s.
	F	Hippocampal CA1 mIPSC	mIPSC frequency (Hz)	Female	P21-24	WT, HT	12(3), 13(4)	WT = 6.469 ± 0.4384	Unpaired Student's t-test (Welch's Correction)		P = 0.2067, n.s.	t(18.37)=1.309	Two-tailed	P = 0.6532, n.s.	P = 0.3928, n.s.
								HT = 5.266 ± 0.8075						P = 0.9275, n.s.	P = 0.1510, n.s.
			mIPSC amplitude (pA)	Female	P21-24	WT, HT	12(3), 13(4)	WT = 38.41 ± 2.049	Unpaired Student's t-test		P = 0.4104, n.s.	t(23)=0.8385	Two-tailed	P = 0.9327, n.s.	P = 0.9886, n.s.
								HT = 41.81 ± 3.396						P = 0.1107, n.s.	P = 0.0591, n.s.
4	A	Hippocampal CA1 Input-Output	fEPSP slope (mV/ms)	Female	P20-22	WT, HT	10(3), 10(3)	2-way ANOVA		Interaction :: P = 0.8471, n.s., DF = 5 Time :: P < 0.0001, ****, DF = 5 Genotype :: P = 0.3658, n.s., DF = 1
									Sidak's multiple comparisons test	0.05	P > 0.9999, n.s.
										0.1	P = 0.9941, n.s.
										0.15	P = 0.9698, n.s.
										0.2	P = 0.9204, n.s.
										0.25	P = 0.8715, n.s.
										0.3	P = 0.7908, n.s.
	B	Hippocampal CA1 Paired-pulse ratio	Paired pulse ratio	Female	P20-22	WT, HT	10(3), 10(3)	2-way ANOVA		Interaction :: P = 0.8947, n.s., DF = 5 Time :: P < 0.0001, ****, DF = 5 Genotype :: P = 0.9993, n.s., DF = 1
									Sidak's multiple comparisons test	25	P > 0.9999, n.s.
										50	P > 0.9999, n.s.
										75	P > 0.9999, n.s.
										100	P = 0.9975, n.s.
										200	P = 0.9998, n.s.
										300	P > 0.9999, n.s.
	C	Hippocampal CA1 HFS-Longterm Potentiation	Last 10 min fEPSP slope (% of baseline)	Male	P90-100	WT, HT	12(6), 14(7)	WT = 153.6 ± 7.423	Mann-Whitney test		P = 0.0356, *	U = 43	Two-tailed	P = 0.0565, n.s.	P = 0.0136, *
								HT = 134.1 ± 5.698						P = 0.4628, n.s.	P = 0.5268, n.s.
	D	Hippocampal CA1 TBS-Longterm Potentiation	Last 10 min fEPSP slope (% of baseline)	Male	P91-99	WT, HT	11(3), 11(4)	WT = 168 ± 4.894	Unpaired Student's t-test		P = 0.0251, *	t(20)=2.421	Two-tailed	P = 0.8355, n.s.	P = 0.5130, n.s.
								HT = 144 ± 8.599						P = 0.9577, n.s.	P = 0.9984, n.s.
	E	Hippocampal CA1 Longterm Depression	Last 10 min fEPSP slope (% of baseline)	Female	P17-23	WT, HT	9(4), 9(5)	WT = 84.62 ± 4.097	Unpaired Student's t-test		P = 0.8223, n.s.	t(16)=0.2283	Two-tailed	P = 0.6573, n.s.	P = 0.8076, n.s.
								HT = 83.33 ± 3.865						P = 0.0698, n.s.	P = 0.2691, n.s.
	F	Hippocampal CA1 NMDA/AMPA ratio	NMDA/AMPA ratio	Female	P21-25	WT, HT	12(5), 12(4)	WT = 0.4016 ± 0.06574	Mann-Whitney test		P = 0.5137, n.s.	U = 60	Two-tailed	P = 0.0149, *	P = 0.0136, *
								HT = 0.3049 ± 0.02016						P = 0.5728, n.s.	P = 0.7205, n.s.
5	A	Morris Water Maze Test	Escape latency (sec)	Male	P108-133	WT, HT	23, 28	2-way ANOVA		Interaction :: P = 0.1109, n.s., DF = 9 Time :: P < 0.0001, ****, DF = 9 Genotype :: P = 0.0001, ***, DF = 1
									Sidak's multiple comparisons test	Day 1	P = 0.9997, n.s.
										Day 2	P = 0.9023, n.s.
										Day 3	P = 0.0309, *
										Day 4	P = 0.0794 n.s.
										Day 5	P = 0.0777, n.s.
										Day 6	P = 0.3672, n.s.
										Day 7	P = 0.1873, n.s.
										Day 9	P = 0.9928, n.s.
										Day 10	P = 0.4453, n.s.
										Day 11	P = 0.0056, **
	B		Quadrant occupancy (%) in Probe test	Male	P108-133	WT, HT	23, 28	2-way ANOVA		Interaction :: P = 0.0002, ***, DF = 3 Time :: P < 0.0001, ****, DF = 3 Genotype :: P = 0.2112, n.s., DF = 1
									Sidak's multiple comparisons test	Target	P = 0.0005, ***
										Left	P = 0.9710, n.s.
										Right	P = 0.6544, n.s.
										Opposite	P = 0.0046, **
			Platfrom crossing number (Count) in Probe test	Male	P108-133	WT, HT	23, 28	WT = 5.87 ± 0.5669	Mann-Whitney test		P = 0.0429, *	U = 216	Two-tailed	P = 0.6349, n.s.	P = 0.5738, n.s.
								HT = 4.321 ± 0.4771						P = 0.0083, **	P = 0.0194, *
	C		Quadrant occupancy (%) in Reversal Probe test	Male	P108-133	WT, HT	23, 28	2-way ANOVA		Interaction :: P < 0.0001, ****, DF = 3 Time :: P < 0.0001, ****, DF = 3 Genotype :: P = 0.3396, n.s., DF = 1
									Sidak's multiple comparisons test	Target	P < 0.0001, ****
										Left	P = 0.0281, *
										Right	P = 0.9995, n.s.
										Opposite	P = 0.0157, *
			Platfrom crossing number (Count) in Reversal Probe Test	Male	P108-133	WT, HT	23, 28	WT = 5.739 ± 0.5231	Mann-Whitney test		P = 0.0123, *	U = 192	Two-tailed	P = 0.5133, n.s.	P = 0.1417, n.s.
								HT = 4 ± 0.3709						P = 0.3862, n.s.	P = 0.0410, *
	D	Novel Object Recognition Test	Novel object preference (%)	Male	P77-86	WT, HT	16, 18	WT = 60.31 ± 3.279	Unpaired Student's t-test (Welch's correction)		P = 0.2662, n.s.	t(23.15)=1.139	Two-tailed	P = 0.2838, n.s.	P = 0.2123, n.s.
								HT = 64.55 ± 1.755						P = 0.4558, n.s.	P = 0.4642, n.s.
			Total interaction time in 1st day (sec)	Male	P77-86	WT, HT	16, 18	WT = 30.6 ± 3.467	Unpaired Student's t-test		P = 0.3534, n.s.	t(32)=0.9416	Two-tailed	P = 0.7703, n.s.	P = 0.8869, n.s.
								HT = 35.94 ± 4.36						P = 0.0547, n.s.	P = 0.1679 n.s.
			Novel object interaction time in 2nd day (sec)	Male	P77-86	WT, HT	16, 18	WT = 20.01 ± 2.772	Unpaired Student's t-test		P = 0.8955, n.s.	t(32)=0.1324	Two-tailed	P = 0.5790, n.s.	P = 0.5686, n.s.
								HT = 19.49 ± 2.805						P = 0.2101, n.s.	P = 0.3121, n.s.
	E	Contextual Fear Test	Duration of freezing (sec) in Pre-exposure	Male	P78-81	WT, HT	13, 10	WT = 0.2638 ± 0.2088	Mann-Whitney test		P = 0.0083, **	U = 31	Two-tailed	P < 0.0001, ****	P < 0.0001, ****
								HT = 2.862 ± 0.9368						P = 0.3019, n.s.	P = 0.0620, n.s.
			Duration of freezing (sec) in After training	Male	P78-81	WT, HT	13, 10	WT = 76.19 ± 3.806	Unpaired Student's t-test		P = 0.1378, n.s.	t(21)=1.543	Two-tailed	P = 0.7693, n.s.	P = 0.8182, n.s.
								HT = 65.92 ± 5.776						P = 0.4908, n.s.	P = 0.5723, n.s.
			Duration of freezing (sec) in After 24hrs	Male	P78-81	WT, HT	13, 10	WT = 55.51 ± 7.083	Unpaired Student's t-test		P = 0.0791, n.s.	t(21)=1.845	Two-tailed	P = 0.5857, n.s.	P = 0.8168, n.s.
								HT = 72.75 ± 5.304						P = 0.2188, n.s.	P = 0.1299, n.s.
			Duration of freezing (sec) in After 1week	Male	P78-81	WT, HT	13, 10	WT = 47.32 ± 5.751	Unpaired Student's t-test		P = 0.0042, **	t(21)=3.207	Two-tailed	P = 0.3416, n.s.	P = 0.5846, n.s.
								HT = 71.71 ± 4.35						P = 0.1714, n.s.	P = 0.1537, n.s.
	F	Rotarod Test	Latency to fall (sec)	Male	P105-114	WT, HT	8, 12	2-way ANOVA		Interaction :: P = 0.4080, n.s., DF = 5 Time :: P < 0.0001, ****, DF = 5 Genotype :: P = 0.1595, n.s., DF = 1
									Sidak's multiple comparisons test	Trial 1	P = 0.1337, n.s.
										Trial 2	P = 0.6761, n.s.
										Trial 3	P > 0.9999, n.s.
										Trial 1	P = 0.9670, n.s.
										Trial 2	P = 0.8677, n.s.
										Trial 3	P = 0.8181, n.s.
6	A	Three Chamber Test (Bright Condition)	Interaction time for Ob vs S1 (sec)	Male	P89-97	WT, HT	15, 21	2-way ANOVA		Interaction :: P = 0.5185, n.s., DF = 1 Choice :: P < 0.0001, ****, DF = 1 Genotype :: P = 0.7235, n.s., DF = 1
									Sidak's multiple comparisons test	Ob vs S1	P < 0.0001, ****
										Ob vs S1	P < 0.0001, ****
	B		Interaction time for S1 vs S2 (sec)	Male	P89-97	WT, HT	15, 21	2-way ANOVA		Interaction :: P = 0.4931, n.s., DF = 1 Choice :: P = 0.0001, ***, DF = 1 Genotype :: P = 0.4216, n.s., DF = 1
									Sidak's multiple comparisons test	S1 vs S2	P = 0.0427, *
										S1 vs S2	P = 0.0010, **
	C		Spent time in chamber for Ob vs S1 (sec)	Male	P89-97	WT, HT	15, 21	2-way ANOVA		Interaction :: P = 0.3010, n.s., DF = 1 Choice :: P < 0.0001, ****, DF = 1 Genotype :: P = 0.7660, n.s., DF = 1
									Sidak's multiple comparisons test	Ob vs S1	P = 0.0030, **
										Ob vs S1	P < 0.0001, ****
	D		Spent time in chamber for S1 vs S2 (sec)	Male	P89-97	WT, HT	15, 21	2-way ANOVA		Interaction :: P = 0.2708, n.s., DF = 1 Choice :: P = 0.4021, n.s., DF = 1 Genotype :: P = 0.1550, n.s., DF = 1
									Sidak's multiple comparisons test	S1 vs S2	P = 0.9800, n.s.
										S1 vs S2	P = 0.2641, n.s.
	E	Adult Direct Interaction Test	Total social interaction time (sec)	Male	P96-110	WT, HT	7, 10	WT = 91 ± 14.1	Unpaired Student's t-test		P = 0.0410, *	t(15)=2.236	Two-tailed		P = 0.3353, n.s.
								HT = 141.9 ± 16.23						P = 0.3912, n.s.	P = 0.4733, n.s.
			Nose-to-nose interaction time (sec)	Male	P96-110	WT, HT	7, 10	WT = 8.354 ± 1.166	Unpaired Student's t-test		P = 0.4587, n.s.	t(15)=0.7606	Two-tailed		P = 0.3007, n.s.
								HT = 7.045 ± 1.183						P = 0.5712, n.s.	P = 0.3632, n.s.
			Following time (sec)	Male	P96-110	WT, HT	7, 10	WT = 12.34 ± 2.538	Unpaired Student's t-test		P = 0.1783, n.s.	t(15)=1.412	Two-tailed		P = 0.8099, n.s.
								HT = 17.66 ± 2.589						P = 0.6277, n.s.	P = 0.7132, n.s.
	F	Adult Ultrasonic Vocalization Test	Number of calls (count)	Male	P103-111	WT, HT	7, 11	WT = 928.4 ± 191.9	Unpaired Student's t-test		P = 0.3517, n.s.	t(16)=0.9592	Two-tailed		P = 0.8628, n.s.
								HT = 702.5 ± 143						P = 0.9844, n.s.	P = 0.2728, n.s.
			Duration of each call (sec)	Male	P103-111	WT, HT	7, 11	WT = 0.01833 ± 0.00487	Unpaired Student's t-test		P = 0.5780, n.s.	t(16)=0.5679	Two-tailed		P = 0.6758, n.s.
								HT = 0.02137 ± 0.002962						P = 0.4629, n.s.	P = 0.7655 n.s.
			Latency to first call (sec)	Male	P103-111	WT, HT	7, 11	WT = 1.469 ± 0.9218	Mann-Whitney test		P = 0.6590, n.s.	U = 33	Two-tailed		P = 0.0025, **
								HT = 1.94 ± 0.5877						P = 0.3260, n.s.	P = 0.0374, *
	G	Adult Repetitive Behavior Test	Grooming time (sec)	Male	P86-94	WT, HT	8,12	WT = 73.23 ± 11.67	Unpaired Student's t-test		P = 0.7861, n.s.	t(18)=0.2755	Two-tailed	P = 0.5844, n.s.	P = 0.4272, n.s.
								HT = 79.18 ± 15.71						P = 0.4406, n.s.	P = 0.0675, n.s.
			Rearing time (sec)	Male	P86-94	WT, HT	8,12	WT = 16.88 ± 2.936	Unpaired Student's t-test (Welch's Correction)		P = 0.1238, n.s.	t(16.11)=1.624	Two-tailed	P = 0.3040, n.s.	P = 0.1620, n.s.
								HT = 27 ± 5.501						P = 0.2322, n.s.	P = 0.1428, n.s.
7	A	Adult Open Field Test	Distance moved (cm)	Male	P76-84	WT, HT	8, 11	2-way ANOVA		Interaction :: P = 0.5591, n.s., DF = 5 Time :: P < 0.0001, ****, DF = 5 Genotype :: P = 0.8621, n.s., DF = 1
									Sidak's multiple comparisons test	10 min	P > 0.9999, n.s.
										20 min	P = 0.9739, n.s.
										30 min	P = 0.9264, n.s.
										40 min	P = 0.9974, n.s.
										50 min	P > 0.9999, n.s.
										60 min	P > 0.9999, n.s.
			Total distance moved (cm)	Male	P76-84	WT, HT	8, 11	WT = 13432 ± 1323	Unpaired Student's t-test		P = 0.8621, n.s.	t(17)=0.1763	Two-tailed	P = 0.9683, n.s.	P = 0.9927, n.s.
								HT = 13691 ± 803.1						P = 0.9343, n.s.	P = 0.9632, n.s.
	B		Time in Center (sec)	Male	P76-84	WT, HT	8, 11	2-way ANOVA		Interaction :: P = 0.7265, n.s., DF = 5 Time :: P < 0.0001, ****, DF = 5 Genotype :: P = 0.2958, n.s., DF = 1
									Sidak's multiple comparison test	10 min	P = 0.4211, n.s.
										20 min	P > 0.9999, n.s.
										30 min	P = 0.9696, n.s.
										40 min	P = 0.9105, n.s.
										50 min	P = 0.9919, n.s.
										60 min	P = 0.9632, n.s.
			Total time in center (sec)	Male	P76-84	WT, HT	28, 28	WT = 251.1 ± 59.06	Mann-Whitney test		P = 0.5999, n.s.	U = 37	Two-tailed	P = 0.3206, n.s.	P = 0.0358, *
								HT = 190.4 ± 22.1						P = 0.6946, n.s.	P = 0.6626, n.s.
	C	LABORAS	Distance moved (m)	Male	P62-70	WT, HT	8,12	2-way ANOVA		Interaction :: P = 0.0065, **, DF = 95 Time :: P < 0.0001, ****, DF = 95 Genotype :: P = 0.0281, *, DF = 1
									Sidak's multiple comparison test	14:00:00	P > 0.9999, n.s.
										16:00:00	P > 0.9999, n.s.
										18:00:00	P = 0.9999, n.s.
										20:00:00	P > 0.9999, n.s.
										22:00:00	P = 0.9921, n.s.
										1900-01-01	P > 0.9999, n.s.
										1900-01-01 02:00:00	P > 0.9999, n.s.
										1900-01-01 04:00:00	P > 0.9999, n.s.
										1900-01-01 06:00:00	P > 0.9999, n.s.
										1900-01-01 08:00:00	P > 0.9999, n.s.
										1900-01-01 10:00:00	P > 0.9999, n.s.
										1900-01-01 12:00:00	P > 0.9999, n.s.
										1900-01-01 14:00:00	P > 0.9999, n.s.
										1900-01-01 16:00:00	P = 0.9987, n.s.
										1900-01-01 18:00:00	P = 0.9292, n.s.
										1900-01-01 20:00:00	P > 0.9999, n.s.
										1900-01-01 22:00:00	P = 0.9925, n.s.
										1900-01-02	P = 0.9882, n.s.
										1900-01-02 02:00:00	P > 0.9999, n.s.
										1900-01-02 04:00:00	P > 0.9999, n.s.
										1900-01-02 06:00:00	P > 0.9999, n.s.
										1900-01-02 08:00:00	P > 0.9999, n.s.
										1900-01-02 10:00:00	P > 0.9999, n.s.
										12:00:00	P = 0.9935, n.s.
										14:00:00	P > 0.9999, n.s.
										16:00:00	P = 0.9957, n.s.
										18:00:00	P > 0.9999, n.s.
										20:00:00	P > 0.9999, n.s.
										21:00:00	P = 0.0038, **
										22:00:00	P > 0.9999, n.s.
										1900-01-01	P = 0.9925, n.s.
										1900-01-01 02:00:00	P > 0.9999, n.s.
										1900-01-01 04:00:00	P > 0.9999, n.s.
										1900-01-01 06:00:00	P = 0.4778, n.s.
										1900-01-01 08:00:00	P > 0.9999, n.s.
										1900-01-01 10:00:00	P > 0.9999, n.s.
										1900-01-01 12:00:00	P = 0.9962, n.s.
										1900-01-01 14:00:00	P > 0.9999, n.s.
										1900-01-01 16:00:00	P = 0.1222, n.s.
										1900-01-01 18:00:00	P = 0.5193, n.s.
										1900-01-01 20:00:00	P > 0.9999, n.s.
										1900-01-01 22:00:00	P > 0.9999, n.s.
										1900-01-02	P > 0.9999, n.s.
										1900-01-02 02:00:00	P > 0.9999, n.s.
										1900-01-02 04:00:00	P > 0.9999, n.s.
										1900-01-02 06:00:00	P > 0.9999, n.s.
										1900-01-02 08:00:00	P > 0.9999, n.s.
										1900-01-02 10:00:00	P > 0.9999, n.s.
										12:00:00	P = 0.9995, n.s.
								WT = 781.2 ± 37.21	Unpaired Student's t-test		P = 0.0281, *	t(18)=2.389	Two-tailed	P = 0.8141, n.s.	P = 0.5166, n.s.
								HT = 624.2 ± 47.34						P = 0.1351, n.s.	P = 0.1073, n.s.
	D		Rearing time (sec)	Male	P62-70	WT, HT	8, 12	WT = 11755 ± 1035	Unpaired Student's t-test		P = 0.0057, **	t(18)=3.137	Two-tailed	P = 0.6826, n.s.	P = 0.7130, n.s.
								HT = 7895 ± 732.2						P = 0.7059, n.s.	P = 0.2562, n.s.
			Grooming time (sec)	Male	P62-70	WT, HT	8, 12	WT = 29563 ± 1725	Unpaired Student's t-test		P = 0.9224, n.s.	t(18)=0.09875	Two-tailed	P = 0.7888, n.s.	P = 0.8409, n.s.
								HT = 29845 ± 2017						P = 0.8042, n.s.	P = 0.9224, n.s.
			Climbing time (sec)	Male	P62-70	WT, HT	8, 12	WT = 26129 ± 3104	Unpaired Student's t-test (Welch's Correction)		P = 0.1723, n.s.	t(9.48)=1.476	Two-tailed	P = 0.0821, n.s.	P = 0.1789, n.s.
								HT = 21163 ± 1298						P = 0.3525, n.s.	P = 0.0568, n.s.
	E	Elevated Plus Maze Test	Time in closed arms (sec)	Male	P82-90	WT, HT	8, 12	WT = 288.8 ± 19.19	Unpaired Student's t-test		P = 0.2255, n.s.	t(18)=1.255	Two-tailed	P = 0.3771, n.s.	P = 0.8379, n.s.
								HT = 320.1± 15.81						P = 0.8998, n.s.	P = 0.8408, n.s.
			Time in open arms (sec)	Male	P70-124	WT, HT	8, 12	WT = 81.93 ± 29.31	Mann-Whitney test		P = 0.4269, n.s.	U = 37	Two-tailed	P = 0.1767, n.s.	P = 0.0105, *
								HT = 44.84 ± 8.599						P = 0.0816, n.s.	P = 0.1018, n.s.
			Closed arm entry number (Count)	Male	P70-124	WT, HT	8, 12	WT = 26 ± 4.594	Unpaired Student's t-test		P = 0.9179, n.s.	t(18)=0.1046	Two-tailed	P = 0.7805, n.s.	P = 0.8635, n.s.
								HT = 25.42 ± 3.379						P = 0.2667, n.s.	P = 0.2755, n.s.
			Open arm entry number (Count)	Male	P70-124	WT, HT	8, 12	WT = 12.38 ± 2.549	Mann-Whitney test		P = 0.6364, n.s.	U = 41.5	Two-tailed	P = 0.0010, **	P = 0.0054, **
								HT = 13.17 ± 1.902						P = 0.7233, n.s.	P = 0.8301, n.s.
	F	Light-Dark Chamber Test	Time in light chamber (sec)	Male	P84-99	WT, HT	15, 21	WT = 220.6 ± 45.3	Mann-Whitney test		P = 0.2385, n.s.	U = 120	Two-tailed	P = 0.0243, *	P = 0.0020, **
								HT = 156.1 ± 29.51						P < 0.0001, ****	P = 0.0015, **
			Number of transitions (Count)	Male	P84-99	WT, HT	15, 21	WT = 28.13 ± 4.202	Unpaired Student's t-test		P = 0.0311, *	t(34)=2.248	Two-tailed	P = 0.8939, n.s.	P = 0.9042, n.s.
								HT = 18.05 ± 2.329						P = 0.6252, n.s.	P = 0.6510, n.s.
	G	Seizure Susceptability Test	Myoclonic jerk frequency (Hz)	Male	P125-133	WT, HT	18, 21	WT = 0.06938 ± 0.01373	Unpaired Student's t-test		P = 0.3882, n.s.	t(37)=0.8732	Two-tailed	P = 0.4636, n.s.	P = 0.1934, n.s.
								HT = 0.05671 ± 0.006515						P = 0.9767, n.s.	P = 0.8533, n.s.
			Seizure susceptability score (au)	Male	P125-133	WT, HT	18, 21	WT = 0.1457 ± 0.01178	Unpaired Student's t-test		P = 0.2159, n.s.	t(37)=1.259	Two-tailed	P = 0.2561, n.s.	P = 0.0832, n.s.
								HT = 0.11683 ± 0.01321						P = 0.2894, n.s.	P = 0.2829, n.s.
	H	Acoustic Startle Response Test	Response (mV)	Male	P75-77	WT, HT	13, 10	2-way ANOVA		Interaction :: P = 0.9805, n.s., DF = 11 Sound dBs :: P < 0.0001, ****, DF = 11 Genotype :: P = 0.9349, n.s., DF = 1
									Sidak's multiple comparison test	65	P > 0.9999, n.s.
										70	P > 0.9999, n.s.
										75	P > 0.9999, n.s.
										80	P > 0.9999, n.s.
										85	P > 0.9999, n.s.
										90	P > 0.9999, n.s.
										95	P > 0.9999, n.s.
										100	P > 0.9999, n.s.
										105	P > 0.9999, n.s.
										110	P = 0.9773, n.s.
										115	P > 0.9999, n.s.
										120	P = 0.9980, n.s.
8	A	Pup Ultrasonic Vocalization Test	Number of calls (Count)	Male, Female	P4-10	WT, HT	20, 27	2-way ANOVA		Interaction :: P = 0.6650, n.s., DF = 3 Day :: P = 0.7330, n.s., DF = 3 Genotype :: P = 0.3571, n.s., DF = 1
								Sidak's multiple comparisons test		P4	P = 0.9726, n.s.
										P6	P = 0.7306, n.s.
										P8	P = 0.7758, n.s.
										P10	P = 0.9943, n.s.
			Duration of each calls (sec)	Male, Female	P4-10	WT, HT	20, 27	2-way ANOVA		Interaction :: P = 0.6837, n.s., DF = 3 Day :: P < 0.0001, ****, DF = 3 Genotype :: P = 0.9737, n.s., DF = 1
								Sidak's multiple comparisons test		P4	P = 0.8588, n.s.
										P6	P = 0.9868, n.s.
										P8	P > 0.9999, n.s.
										P10	P = 0.9756, n.s.
	B	Juvenile Direct Interaction Test	Total social interaction time (sec)	Male	P21	WT,HT	8, 14	WT = 108.7 ± 13.4	Unpaired Student's t-test (with Outlier test)		P = 0.0110, *	t(20)=2.8	Two-tailed	P = 0.6602, n.s.	P = 0.9469, n.s.
								HT = 156.8 ± 10.47						P = 0.8093, n.s.	P = 0.9963, n.s.
			Nose-to-nose interaction time (sec)	Male	P21	WT, HT	8, 14	WT = 10.07 ± 0.8598	Unpaired Student's t-test (with Outlier test)		P = 0.1165, n.s.	t(20)=1.641	Two-tailed	P = 0.7013 n.s.	P = 0.9271, n.s.
								HT = 12.86 ± 1.182						P = 0.5885, n.s.	P = 0.7743, n.s.
			Following time (sec)	Male	P21	WT, HT	8, 14	WT = 13.64 ± 3.213	Unpaired Student's t-test (with Outlier test)		P = 0.3869, n.s.	t(20)=0.8846	Two-tailed	P = 0.7930, n.s.	P = 0.9329, n.s.
								HT = 16.55 ± 1.693						P = 0.7658, n.s.	P = 0.6080, n.s.
	C	Maternal Homing Test	Time spent in Nest homing phase (sec)	Male, Female	P19	WT, HT	16, 25	2-way ANOVA		Interaction :: P = 0.3074, n.s., DF = 3 Area :: P < 0.0001, ****, DF = 3 Genotype :: P = 0.9876, n.s., DF = 1
								Sidak's multiple comparisons test		New bedding	P = 0.4215, n.s.
										Homecage bedding	P = 0.3885, n.s.
										Corner 1	P > 0.9999, n.s.
										Corner 2	P > 0.9999, n.s.
			Time spent in Maternal homing phase (sec)	Male, Female	P19	WT, HT	16, 25	2-way ANOVA		Interaction :: P = 0.8688, n.s., DF = 3 Area :: P < 0.0001, ****, DF = 3 Genotype :: P = 0.1847, n.s., DF = 1
								Sidak's multiple comparisons test		New bedding	P = 0.9221, n.s.
										Homecage bedding	P > 0.9999, n.s.
										Dam	P = 0.9998, n.s.
										Empty	P =0.9491, n.s.
	D	Juvenile Repetitive behavior Test	Grooming time (sec)	Male, Female	P26	WT, HT	20.28	WT = 95.47 ± 9.678	Unpaired Student's t-test		P = 0.9290, n.s.	t(46)=0.08962	Two-tailed	P = 0.2839 n.s.	P = 0.0531, n.s.
								HT = 96.5 ± 6.856						P = 0.2682, n.s.	P = 0.2618, n.s.
	E	Juvenile Open Field Test	Distance moved (cm)	Male, Female	P24	WT, HT	19, 28	2-way ANOVA		Interaction :: P = 0.4624, n.s., DF = 3 Time :: P = 0.0006, ***, DF = 3 Genotype :: P = 0.0333, *, DF = 1
								Sidak's multiple comparisons test		5 min	P= 0.5908, n.s.
										10 min	P = 0.1955, n.s.
										15 min	P = 0.0400, *
										20 min	P = 0.5815, n.s.
			Total distance moved (cm)	Male, Female	P24	WT, HT	19, 28	WT = 5271 ± 342.2	Unpaired Student's t-test		P = 0.0488, *	t(45)=2.025	Two-tailed	P = 0.0564 n.s.	P = 0.1993, n.s.
								HT = 4538± 188						P = 0.5432, n.s.	P = 0.4664 ,n.s.
	F		Time in Center (sec)	Male, Female	P24	WT, HT	19, 28	2-way ANOVA		Interaction :: P = 0.1344, n.s., DF = 3 Time :: P = 0.0002, ***, DF = 3 Genotype :: P = 0.0364, *, DF = 1
								Sidak's multiple comparisons test		5 min	P= 0.8553, n.s.
										10 min	P = 0.7514, n.s.
										15 min	P = 0.9336, n.s.
										20 min	P = 0.0065, **
			Total time in center (sec)	Male, Female	P24	WT, HT	19, 28	WT = 76.56 ± 8.822	Unpaired Student's t-test		P = 0.9290, n.s.	t(46)=0.08962	Two-tailed	P = 0.4406 n.s.	P = 0.3783, n.s.
								HT = 113.5± 12.9						P = 0.1007, n.s.	P = 0.0481, *
